# Supplementary material for: Usability assessment of Versius, a new robot-assisted surgical device for use in minimal access surgery
Source: PubMed Central journal article supplement — BMJ Surg Interv Health Technol. 2020 May 22;2(1):e000028. doi: 10.1136/bmjsit-2019-000028 (PMC8749256; doi:10.1136/bmjsit-2019-000028), 2020-05-22

Revised Versius Usability Study – Supplementary Materials

23 January 2020

- 1 **Usability Assessment of Versius, a New Robot-Assisted**
- 2 **Surgical Device for use in Minimal Access Surgery**
- 3
- 4 F. Haig, A.C.B. Medeiros, K. Chitty, M. Slack
- 5 **SUPPLEMENTARY MATERIALS**

Revised Versius Usability Study – Supplementary Materials

23 January 2020

1 **SUPPLEMENTARY DATA**2 **Supplemental Table 1.** Task subgroups undertaken by user group

| Subgroup                                                               | S | AS | SN | CN |
|------------------------------------------------------------------------|---|----|----|----|
| Transport and storage at hospital                                      |   |    | ✓  | ✓  |
| System setup                                                           | ✓ | ✓  | ✓  | ✓  |
| Visualisation and arm draping                                          |   |    | ✓  | ✓  |
| Instrument arm draping                                                 |   |    | ✓  | ✓  |
| Cart draping                                                           |   |    | ✓  | ✓  |
| Endoscopic camera setup                                                | ✓ | ✓  | ✓  | ✓  |
| Cart positioning                                                       | ✓ | ✓  | ✓  | ✓  |
| Port training and instrument adjust                                    | ✓ | ✓  | ✓  |    |
| Console setup                                                          | ✓ |    |    | ✓  |
| Menu Navigation                                                        | ✓ | ✓  | ✓  | ✓  |
| Generic surgical procedure                                             | ✓ | ✓  | ✓  | ✓  |
| Instrument change or removal                                           | ✓ | ✓  | ✓  |    |
| Endoscope clean or replace                                             | ✓ | ✓  | ✓  |    |
| Remove all arms                                                        |   | ✓  | ✓  |    |
| Convert to open/manual                                                 | ✓ |    |    | ✓  |
| Close with scope                                                       | ✓ | ✓  | ✓  |    |
| Alarms                                                                 | ✓ | ✓  | ✓  | ✓  |
| Teardown and cleaning                                                  |   |    | ✓  | ✓  |
| Sleep scenario                                                         | ✓ |    |    | ✓  |
| Knowledge test (e.g. Battery operation and system icon identification) | ✓ | ✓  | ✓  | ✓  |

1 **Supplemental Table 2.** All tasks undertaken during the simulated use workflow

| Category              | Task                                                   | Critical (Y/N) |
|-----------------------|--------------------------------------------------------|----------------|
| Transport and Storage | Take accessory from hospital storage                   | N              |
|                       | Collect single-use items from storage                  | N              |
|                       | Select appropriate length of drape                     | Y              |
|                       | Transport single-use items (and accessories) to OR     | N              |
|                       | Release console brake                                  | N              |
|                       | Transport console to operating theatre                 | Y              |
|                       | Remove brake from Cart                                 | N              |
|                       | Transport cart to / from operating theatre             | Y              |
| System setup          | Remove brake from console                              | N              |
|                       | Plug in console                                        | Y              |
|                       | Switch console on                                      | N              |
|                       | Check if console passes POST                           | N              |
|                       | Connect Aux Display to console                         | N              |
|                       | Pull out console arms                                  | Y              |
|                       | Set console height                                     | Y              |
|                       | Set screen height                                      | Y              |
|                       | Set screen angle to aid in cart connection and draping | N              |
|                       | Select 2D or 3D                                        | N              |
|                       | Move cursor to menu icon                               | Y              |
|                       | Select menu or sub-menu                                | Y              |
|                       | Assign endoscope angle                                 | Y              |
|                       | Assign language                                        | N              |
| Access system status  | N                                                      |                |

2

3

## Revised Versius Usability Study – Supplementary Materials

23 January 2020

|                                                                            |                                                          |                                                               |
|----------------------------------------------------------------------------|----------------------------------------------------------|---------------------------------------------------------------|
|                                                                            | Access "About"                                           | N                                                             |
|                                                                            | Release brake from cart                                  | N                                                             |
|                                                                            | Engage brake on cart                                     | Y                                                             |
|                                                                            | User decides on cable length to use                      | Y                                                             |
|                                                                            | User finds cable of desired length                       | Y                                                             |
|                                                                            | User folds away flip-out console cable retainers         | N                                                             |
|                                                                            | Connect cart to console                                  | N                                                             |
|                                                                            | Connect cart to cart                                     | Y                                                             |
|                                                                            | Connect video feed between console and visualisation BSU | N                                                             |
|                                                                            | Identify there is an alarm on Instrument BSU             | N                                                             |
|                                                                            | Decide what to do (remove arm)                           | N                                                             |
|                                                                            | Replace alarmed arm                                      | N                                                             |
|                                                                            | Power down alarmed unit                                  | N                                                             |
|                                                                            | Draping                                                  | Press and hold sleep mode button to wake up Visualisation BSU |
| Push Visualisation arm to accessible position to facilitate easy draping   |                                                          | Y                                                             |
| Select appropriate length of drape                                         |                                                          | Y                                                             |
| Unpack the Visualisation BSU drape and expose sterile drape to Scrub Nurse |                                                          | Y                                                             |
| Place hands into folds as indicated by labels                              |                                                          | N                                                             |
| Place drape on robotic arm                                                 |                                                          | Y                                                             |
| Fit Visualisation BSU drape cap to mounting bracket                        |                                                          | Y                                                             |
| Unfurl sleeve of drape below elbow (but before shoulder)                   |                                                          | Y                                                             |
| Remove yellow tape                                                         |                                                          | N                                                             |
| Pull down cart drape to cover cart                                         |                                                          | Y                                                             |
| Locate cart drape elastic at top of cart column                            |                                                          | Y                                                             |
| Tether drape in place on arm                                               |                                                          | Y                                                             |
| Remove green tape                                                          |                                                          | Y                                                             |

## Revised Versius Usability Study – Supplementary Materials

23 January 2020

|                   |                                                                                              |   |
|-------------------|----------------------------------------------------------------------------------------------|---|
|                   | Press and hold sleep mode button to wake up Instrument BSU                                   | N |
|                   | Push the instrument BSU arm to accessible position to facilitate easy draping                | N |
|                   | Select appropriate length of drape                                                           | Y |
|                   | Unpack the Instrument BSU arm drape and expose sterile drape to Scrub Nurse                  | Y |
|                   | Place hands into folds as indicated by labels                                                | N |
|                   | Place drape on robotic arm                                                                   | Y |
|                   | Fit drape cap to instrument interface                                                        | Y |
|                   | Engage locking ring on instrument arm drape cap                                              | Y |
|                   | Fit drape insert to drape cap                                                                | Y |
|                   | Remove tape from drape cap insert                                                            | Y |
|                   | Unfurl instrument arm sleeve down arm                                                        | Y |
|                   | Remove yellow tape                                                                           | N |
|                   | Pull down cart drape to cover cart                                                           | Y |
|                   | Locate cart drape elastic at top of cart column                                              | Y |
|                   | Tether drape in place on arm                                                                 | Y |
|                   | Remove green tapes                                                                           | Y |
| Endoscope draping | Choose telescope based on desired angle                                                      | N |
|                   | If chosen angle is 30 degrees then put in correct orientation (up or down)                   | N |
|                   | Drape telescope                                                                              | Y |
|                   | Drape camera                                                                                 | Y |
|                   | Connect camera to telescope                                                                  | Y |
|                   | Connect video feed between console and visualisation BSU (if not already done during set-up) | N |
|                   | Connect camera cable to cart                                                                 | N |
|                   | Connect light cable to camera                                                                | N |
|                   | White balance camera                                                                         | Y |

## Revised Versius Usability Study – Supplementary Materials

23 January 2020

|                 |                                                                       |   |
|-----------------|-----------------------------------------------------------------------|---|
|                 | Insert endoscope (for manual use)                                     | N |
| BSU positioning | Press elbow button to lock arm before moving to bedside               | N |
|                 | Release cart brake for cart positioning                               | Y |
|                 | Move cart to desired bedside position                                 | Y |
|                 | Activate cart brake for cart positioning                              | Y |
|                 | Set and check relative cart orientation – visualisation ARM           | Y |
|                 | Adjust cart height for arm setup                                      | Y |
|                 | Attach endoscope to arm                                               | Y |
|                 | Tether light cable                                                    | N |
|                 | Press elbow button to lock arm before moving to bedside               | N |
|                 | Release cart brake for cart positioning                               | Y |
|                 | Move cart to desired bedside position                                 | Y |
|                 | Activate cart brake for cart positioning                              | Y |
|                 | Set and check relative cart orientation                               | Y |
|                 | Adjust cart height for arm setup                                      | Y |
|                 | Attach instrument                                                     | Y |
|                 | Identify that instrument life has expired (will happen on 1 arm only) | N |
|                 | Connect ES generator to cart                                          | Y |
|                 | Tether ES instrument cable down arm                                   | Y |
|                 | Plug ES instrument cable to cart                                      | Y |

1

6

## Revised Versius Usability Study – Supplementary Materials

23 January 2020

|                                                                                   |                                                                                   |   |
|-----------------------------------------------------------------------------------|-----------------------------------------------------------------------------------|---|
| Port training and instrument adjust                                               | Place endoscope into the port ready for port training                             | N |
|                                                                                   | Port train endoscope                                                              | Y |
|                                                                                   | Move (endoscope) to operative area in instrument adjust mode                      | Y |
|                                                                                   | Put endoscope in surgical mode                                                    | N |
|                                                                                   | Press wrist button to switch to unlock arm                                        | N |
|                                                                                   | Insert instrument into port training instrument 2                                 | Y |
|                                                                                   | Switch arm to Port Training Mode by pressing wrist button                         | Y |
|                                                                                   | Use is aware they are in "Port Training" mode                                     | N |
|                                                                                   | Port Train the VPP by moving the wrist in an arc back and forth                   | Y |
|                                                                                   | Port training fails - user required to re-enter port training mode (if it occurs) | Y |
|                                                                                   | Port training successful - press wrist button to enter instrument adjust          | N |
|                                                                                   | Advance instrument into cavity using arm so that instrument is visible to surgeon | Y |
|                                                                                   | Press wrist button to switch to Surgical Mode                                     | Y |
|                                                                                   | Insert instrument into port                                                       | Y |
|                                                                                   | Switch arm to Port Training Mode by pressing wrist button                         | Y |
|                                                                                   | Use is aware they are in "Port Training" mode                                     | N |
|                                                                                   | Port Train the VPP by moving the wrist in an arc back and forth                   | Y |
|                                                                                   | Port training fails - user required to re-enter port training mode (if it occurs) | Y |
|                                                                                   | Port training successful - press wrist button to enter instrument adjust          | N |
|                                                                                   | Advance instrument into cavity using arm so that instrument is visible to surgeon | Y |
|                                                                                   | Press wrist button to switch to Surgical Mode                                     | Y |
|                                                                                   | Insert instrument into port                                                       | Y |
|                                                                                   | Switch arm to Port Training Mode by pressing wrist button                         | Y |
|                                                                                   | Use is aware they are in "Port Training" mode                                     | N |
| Port Train the VPP by moving the wrist in an arc back and forth                   | Y                                                                                 |   |
| Port training fails - user required to re-enter port training mode (if it occurs) | Y                                                                                 |   |

## Revised Versius Usability Study – Supplementary Materials

23 January 2020

|                                    |                                                                                    |   |
|------------------------------------|------------------------------------------------------------------------------------|---|
|                                    | Port training successful - press wrist button to enter instrument adjust           | N |
|                                    | Advance instrument into cavity using arm so that instrument is visible to surgeon  | Y |
|                                    | Press wrist button to switch to Surgical Mode                                      | Y |
| Console set-up and menu navigation | Pull out console arms (if not already done)                                        | Y |
|                                    | Set the console height (if not already done and/or if the surgeon wants to adjust) | Y |
|                                    | Set screen height (if not already done and/or if the surgeon wants to adjust)      | Y |
|                                    | Select 2D or 3D                                                                    | N |
|                                    | Surgeon puts on 3D glasses                                                         | N |
|                                    | Move cursor to menu icon                                                           | Y |
|                                    | Select menu or sub-menu item                                                       | Y |
|                                    | Assign language                                                                    | N |
|                                    | Check hand scaling and change if necessary                                         | Y |
|                                    | Select claim surgery                                                               | N |
|                                    | Scan QR code with mobile or tablet                                                 | N |
|                                    | Assign endoscope angle                                                             | Y |
|                                    | Assign connected arm to hand                                                       | Y |
|                                    | Disengage instrument                                                               | N |
|                                    | Turn video recorder on and off                                                     | Y |
|                                    | Exit menu                                                                          | N |
|                                    | Access system status                                                               | N |
| Access 'About'                     | N                                                                                  |   |

1



## Revised Versius Usability Study – Supplementary Materials

23 January 2020

|                                                                 |                                                                                    |   |
|-----------------------------------------------------------------|------------------------------------------------------------------------------------|---|
| Surgical procedure – Surgeon                                    | Place endoscope into the port ready for port training                              | N |
|                                                                 | Port train endoscope                                                               | Y |
|                                                                 | Put endoscope in surgical mode                                                     | N |
|                                                                 | Undock the hand controllers                                                        | N |
|                                                                 | Stow the dock features into the arm rest                                           | N |
|                                                                 | Visualise the surgical field                                                       | Y |
|                                                                 | Orientate the instrument                                                           | Y |
|                                                                 | Move instruments to the operative field                                            | Y |
|                                                                 | Engage instrument                                                                  | Y |
|                                                                 | Surgeon disengages instruments                                                     | Y |
|                                                                 | Actuate jaw control                                                                | Y |
|                                                                 | Actuate articulated instrument (instrument pitch, roll, yaw)                       | Y |
|                                                                 | Select ES mode                                                                     | Y |
|                                                                 | Actuate electro-surgery                                                            | Y |
|                                                                 | Rest hands (letting go of hand controllers)                                        | Y |
|                                                                 | Rest hands (grasping the hand controllers)                                         | Y |
|                                                                 | Selecting of alternative instrument/arm                                            | Y |
|                                                                 | Dock the hand controllers                                                          | N |
|                                                                 | Communications between members of surgical team                                    | Y |
|                                                                 | Miscellaneous errors arising during general surgical procedure                     | Y |
|                                                                 | Clear instrument jaws of anatomy (instrument change scenario)                      | Y |
|                                                                 | Straighten/close instrument jaws manually (instrument change scenario)             | Y |
|                                                                 | Straighten/close instrument jaws using thumb stick (instrument change scenario)    | Y |
|                                                                 | Surgeon request Instrument Change                                                  | Y |
|                                                                 | Hand not detected if this happens - User identifies there is an issue and corrects | Y |
| Surgeon requests instrument change (instrument adjust scenario) | Y                                                                                  |   |

## Revised Versius Usability Study – Supplementary Materials

23 January 2020

|                   |                                                                                                                              |   |
|-------------------|------------------------------------------------------------------------------------------------------------------------------|---|
|                   | Surgeon clears instrument jaws of anatomy (instrument adjust scenario)                                                       | Y |
|                   | Surgeon straightens/closes instrument jaws manually (instrument adjust scenario)                                             | Y |
|                   | Surgeon straightens/closes instrument jaws using thumb stick (instrument adjust scenario)                                    | Y |
|                   | Surgeon requests endoscope is cleaned                                                                                        | N |
|                   | Surgeon requests endoscope is changed                                                                                        | N |
|                   | Surgeon disengages instruments                                                                                               | Y |
|                   | Actuate Stop                                                                                                                 | Y |
|                   | Recognise Stop                                                                                                               | N |
|                   | Identify there is an alarm (arm high priority alarm scenario)                                                                | Y |
|                   | Identify there is an alarm (system medium alarm console flashing yellow leading to locking of arms scenario)                 | Y |
|                   | Pause alert audio (only if surgical team choose this action)                                                                 | N |
|                   | Unpause alert audio (via console)                                                                                            | N |
|                   | Unpause alert audio (via menu)                                                                                               | N |
| Instrument change | Press the wrist button to put the arm in instrument change mode                                                              | Y |
|                   | Recognise that arm has entered instrument change mode                                                                        | N |
|                   | Use one hand to retract instrument by sliding along the virtual Z rail. Use other hand to hold the port.                     | Y |
|                   | Remove ES cable from instrument (if applicable) (instrument change mode)                                                     | N |
|                   | Remove the instrument by squeezing together instrument latches on the instrument using one hand (instrument change scenario) | Y |
|                   | Pass instrument to scrub nurse or place on the robotic instrument tray (instrument change scenario)                          | Y |
|                   | Pick up new instrument from scrub tray in front or to the side (instrument change scenario)                                  | Y |
|                   | Attach new instrument                                                                                                        | Y |
|                   | Attach ES cable (if applicable, in instrument change or instrument adjust scenario)                                          | Y |
|                   | Slide new instrument along the virtual Z rail until it is in view of endoscope                                               | Y |
|                   | Press the wrist button to return arm from instrument change mode to surgical mode                                            | Y |
|                   | User moves to Instrument Adjust by pressing elbow button                                                                     | Y |
|                   | Uses one hand to retract instrument by sliding back through port. Use other hand to hold the port.                           | Y |

## Revised Versius Usability Study – Supplementary Materials

23 January 2020

|                                   |                                                                                                                 |   |
|-----------------------------------|-----------------------------------------------------------------------------------------------------------------|---|
|                                   | Remove ES cable from instrument (if applicable)                                                                 | N |
|                                   | Remove the instrument by squeezing together instrument latches on the instrument using one hand                 | Y |
|                                   | Pass instrument to scrub nurse or place on the robotic instrument tray (instrument adjust scenario)             | Y |
|                                   | Pick up new instrument from scrub tray (in instrument adjust scenario)                                          | Y |
|                                   | Attach new instrument                                                                                           | Y |
|                                   | User attaches ES cable (if applicable)                                                                          | Y |
|                                   | User reinserts instrument into port and advances to surgical site in instrument adjust mode under visualisation | Y |
|                                   | Press the wrist button to return arm from instrument adjust mode to surgical mode                               | Y |
| Surgical procedure – bedside team | Communication between members of the surgical team                                                              | Y |
|                                   | Move elbow (for access)                                                                                         | Y |
|                                   | Miscellaneous errors arising during general surgical procedure - where applicable                               | Y |
|                                   | Maintain sterility                                                                                              | Y |
|                                   | Surgeon requests endoscope is cleaned                                                                           | N |
|                                   | Press the V-Wrist button to put the arm in instrument change mode                                               | Y |
|                                   | Enter instrument change mode                                                                                    | N |
|                                   | Use one hand to retract endoscope by sliding along the virtual Z rail. Use the other hand to hold the port.     | Y |
|                                   | User wipes the endoscope with gauze                                                                             | Y |
|                                   | Press the wrist button to return the arm to surgical mode                                                       | Y |
|                                   | Enter surgical mode (clean scope scenario)                                                                      | Y |
|                                   | Surgeon requests endoscope is changed                                                                           | N |
|                                   | Change of endoscope (assume endoscopic camera has been retracted from patient in instrument change mode)        | Y |
|                                   | Slide new endoscope back along the virtual Z rail until you have visualisation of the operative area            | Y |
|                                   | User unplugs cable from cart                                                                                    | Y |
|                                   | Operate arm while disconnected from console and battery low such that arm becomes locked                        | N |
| Recognise Stop                    | N                                                                                                               |   |
| Press resume button               | N                                                                                                               |   |

## Revised Versius Usability Study – Supplementary Materials

23 January 2020

|                                                                                          |   |
|------------------------------------------------------------------------------------------|---|
| Identify there is an alarm (arm high priority alarm scenario)                            | Y |
| User rushes to arm to support weight                                                     | Y |
| User removes instruments from alarmed arm (small movement to expose pickups)             | Y |
| User manually opens and clears instrument jaws (if applicable)                           | Y |
| Withdraw instrument from patient under visualisation                                     | Y |
| Unplug cart to free arm operation (to remove alarming arm and replace with new cart)     | Y |
| Pause BSU alarm audio                                                                    | N |
| Unpause BSU alarm audio                                                                  | N |
| Identify there is an alarm (system medium alarm console flashing yellow)                 | Y |
| User removes instruments from arms                                                       | Y |
| User manually opens instrument jaws (if applicable)                                      | Y |
| Withdraw instrument from patient under visualisation using alternative endoscope         | Y |
| Use one hand and retract endoscope. Use other hand to hold the port                      | Y |
| Remove the endoscope by squeezing together endoscope latches on endoscope using one hand | Y |
| Untether light cable from drape                                                          | N |
| Release brake from Visualisation BSU and move away from bed                              | Y |
| Reposition Visualisation BSU cart about bed to a more convenient position                | N |
| Activate Visualisation BSU brake                                                         | Y |
| Long press elbow to move to unlocked                                                     | N |
| Reposition robotic arms away from patient                                                | N |
| Press elbow button to lock arms                                                          | N |
| Release brake on instrument carts                                                        | Y |
| Pull cart away from bedside                                                              | Y |
| Apply brake to cart                                                                      | Y |

1

## Revised Versius Usability Study – Supplementary Materials

23 January 2020

|                                                                                                                      |                                                    |   |
|----------------------------------------------------------------------------------------------------------------------|----------------------------------------------------|---|
| Convert to open/manual                                                                                               | Announce covert to manual procedure                | N |
|                                                                                                                      | Hand controllers disengaged                        | N |
|                                                                                                                      | Dock the hand controllers                          | N |
|                                                                                                                      | Access system status (check instrument life)       | N |
|                                                                                                                      | Access 'About' (tech support)                      | N |
|                                                                                                                      | Exit Menu                                          | N |
|                                                                                                                      | Select "end of surgery"                            | N |
|                                                                                                                      | Turning video recorder off                         | Y |
|                                                                                                                      | Surgeon leaves console                             | N |
| Post-surgery                                                                                                         | Use endoscope manually to visualise during close   | N |
|                                                                                                                      | Check instrument inventory on HUD                  | N |
|                                                                                                                      | Select 'End of Surgery' (If not already occurred)  | N |
|                                                                                                                      | Turning video recorder on and off                  | Y |
|                                                                                                                      | Dispose of out of life instruments                 | N |
|                                                                                                                      | Disconnect light cable                             | N |
|                                                                                                                      | Untether light cable from drape                    | N |
|                                                                                                                      | Place light cable on tray for sterilization        | Y |
|                                                                                                                      | Disconnect camera from cart                        | N |
|                                                                                                                      | Untether camera cable from drape                   | N |
|                                                                                                                      | Wipe clean camera using universal wipes            | Y |
|                                                                                                                      | Safely store clean camera for next procedure       | Y |
|                                                                                                                      | Place endoscope in tray / basket for sterilisation | Y |
|                                                                                                                      | Disconnect ES cables from cart                     | N |
|                                                                                                                      | Untether ES cables from drape                      | N |
|                                                                                                                      | Place ES cables in tray for sterilisation          | Y |
| Wipe instrument shaft, attachment head and instrument tip using single-use lint free cloth, to remove excess soiling | Y                                                  |   |

## Revised Versius Usability Study – Supplementary Materials

23 January 2020

|  |                                                                                                             |   |
|--|-------------------------------------------------------------------------------------------------------------|---|
|  | Use syringe to flush instrument primary flush port with 50ml pH neutral enzymatic detergent (or cold water) | Y |
|  | Submerge flushed instruments in detergent or water or foam in sealable container                            | Y |
|  | Send instruments to reprocessing areas as soon as possible after preparing them                             | Y |
|  | Undrape bedside unit                                                                                        | Y |
|  | Wipes surface of arms top down                                                                              | Y |
|  | User wipes surface of cart                                                                                  | Y |
|  | Lower cart to minimum height for transport and storage                                                      | N |
|  | Disconnect auxiliary screen cable from console                                                              | N |
|  | Clean auxiliary screen cable                                                                                | Y |
|  | Store auxiliary screen cable                                                                                | N |
|  | Disconnect cart power cable                                                                                 | N |
|  | Clean cart power cable                                                                                      | Y |
|  | Store cart power cable                                                                                      | N |
|  | Switch off console power switch                                                                             | N |
|  | Disconnect console power cable from wall                                                                    | N |
|  | Disconnect console power cable from console                                                                 | Y |
|  | Clean console power cable                                                                                   | Y |
|  | Clean 3D glasses                                                                                            | N |
|  | Store 3D glasses for next procedure                                                                         | N |
|  | Clean console                                                                                               | N |
|  | Push console arms in for transport and storage                                                              | N |
|  | User checks for clearance around arm before folding arm                                                     | Y |
|  | User presses and holds sleep button to fold arm                                                             | Y |
|  | Move console into storage area                                                                              | N |
|  | Move cart to/from operating theatre                                                                         | Y |

1

## Revised Versius Usability Study – Supplementary Materials

23 January 2020

|                                                                                                                 |                                                                                                                     |   |
|-----------------------------------------------------------------------------------------------------------------|---------------------------------------------------------------------------------------------------------------------|---|
| Drills – Surgeon                                                                                                | Select the correct input source                                                                                     | N |
|                                                                                                                 | Unplug Versius Trainer and power cycle console                                                                      | N |
|                                                                                                                 | Surgeon or Nurse selects 2D or 3D using monitor controls                                                            | N |
|                                                                                                                 | Attach instrument                                                                                                   | Y |
|                                                                                                                 | Press wrist button to unlock arm                                                                                    | N |
|                                                                                                                 | Insert instrument into port                                                                                         | Y |
|                                                                                                                 | Switch arm to Port Training Mode by locating and pressing wrist button                                              | Y |
|                                                                                                                 | Port train the VPP by moving the wrist in an arc back and forth                                                     | Y |
|                                                                                                                 | Port training successful - user presses wrist button to enter Instrument Adjust Mode                                | N |
|                                                                                                                 | Press wrist button to switch to Surgical Mode                                                                       | Y |
|                                                                                                                 | Press the V-Wrist button to put the arm in Instrument Change Mode                                                   | Y |
|                                                                                                                 | Use one hand to retract endoscope/ instrument by sliding along the virtual Z rail. Use other hand to hold the port. | Y |
|                                                                                                                 | Remove the instrument by squeezing together instrument latches on the instrument using one hand.                    | Y |
|                                                                                                                 | Pass instrument to Scrub Nurse or place on the robotic instrument tray                                              | Y |
|                                                                                                                 | Pick up new instrument from scrub tray in front or to the side                                                      | Y |
|                                                                                                                 | Attach new instrument                                                                                               | Y |
|                                                                                                                 | Slide new instrument along the virtual Z rail until it is in view of endoscope                                      | Y |
|                                                                                                                 | Slide new endoscope back along the virtual Z rail until you have visualisation of the operative area                | Y |
|                                                                                                                 | Press the wrist button to return arm from instrument change mode to surgical mode                                   | Y |
|                                                                                                                 | User moves to instrument adjust by pressing elbow button                                                            | Y |
|                                                                                                                 | Use one hand to retract instrument by sliding back through port. Use other hand to hold the port.                   | Y |
|                                                                                                                 | Remove the instrument by squeezing together instrument latches on the instrument using one hand.                    | Y |
|                                                                                                                 | Pass instrument to Scrub Nurse or place on the robotic instrument tray                                              | Y |
| Pick up new instrument from scrub tray.                                                                         | Y                                                                                                                   |   |
| Attach new instrument                                                                                           | Y                                                                                                                   |   |
| User reinserts instrument into port and advances to surgical site in Instrument Adjust Mode under visualisation | Y                                                                                                                   |   |

## Revised Versius Usability Study – Supplementary Materials

23 January 2020

|                                  |                                                                      |   |
|----------------------------------|----------------------------------------------------------------------|---|
|                                  | Press the V-Wrist button to return the arm to Surgical Mode          | Y |
|                                  | User checks for clearance around arm before folding arm              | Y |
|                                  | User presses and holds sleep button to fold arm                      | Y |
|                                  | User aborts sleep operation because of obstruction or change of plan | N |
| Drills – Assistant Surgeon       | Move cursor to Menu icon                                             | Y |
|                                  | Selecting Menu or sub-item                                           | Y |
|                                  | Assign language                                                      | N |
|                                  | Assign endoscope angle                                               | Y |
|                                  | Exit Menu                                                            | N |
| Drills – Circulating/Scrub Nurse | Remove brake from console                                            | N |
|                                  | Transport console to operating theatre                               | Y |
|                                  | Move console up/down ramp                                            | Y |
|                                  | Move console into storage area                                       | N |
|                                  | Remove brake from cart                                               | N |
|                                  | Transport cart to/from operating theatre                             | Y |
|                                  | Move cart up/down ramp                                               | Y |
|                                  | Select the correct input source                                      | N |
|                                  | Unplug Versius Trainer and power cycle console                       | N |
|                                  | Surgeon or Nurse selects 2D or 3D using monitor controls             | N |
|                                  | Move cursor to menu icon                                             | Y |
|                                  | Select Menu or sub-item                                              | Y |
|                                  | Assign language                                                      | N |
|                                  | Assign endoscope angle                                               | Y |
|                                  | Exit Menu                                                            | N |

1



## Revised Versius Usability Study – Supplementary Materials

23 January 2020

|                |                                                                                                                                                                                         |   |
|----------------|-----------------------------------------------------------------------------------------------------------------------------------------------------------------------------------------|---|
| Knowledge test | Where in the instructions can you find the precautions you should observe when preparing the instruments for reprocessing?                                                              | Y |
|                | Where in the instructions can you find the equipment you need to prepare the instruments?                                                                                               | Y |
|                | Which parts of the instrument do you need to wipe? Can you identify on which page of the reprocessing instructions you would find this information?                                     | Y |
|                | What should you use to flush the instrument? Can you identify on which page of the reprocessing instructions you would find this information?                                           | Y |
|                | Can you find in the instructions how much liquid you need to use?                                                                                                                       | Y |
|                | Can you talk through step 3 of reprocessing a Versius instrument?                                                                                                                       | Y |
|                | Once you've finished preparing the instruments, when should you send for reprocessing? Can you identify on which page of the reprocessing instructions you would find this information? | Y |

1 BSU: bedside unit; ES: electrosurgery; N: no; OR: operating room; VPP: virtual pivot point; Y: yes.

1 **Supplemental Table 3.** Root cause analyses of use errors encountered during critical task completion

| Task                                                                       | Description                                                                                                                              | Root Cause                                                                                                                                  |
|----------------------------------------------------------------------------|------------------------------------------------------------------------------------------------------------------------------------------|---------------------------------------------------------------------------------------------------------------------------------------------|
| <b>Move console up/down ramp</b>                                           | T1SN could not control the movement of the console                                                                                       | One of the console wheels became locked                                                                                                     |
|                                                                            | T4SN unable to move the console up/down the ramp                                                                                         | A console wheel became stuck                                                                                                                |
| <b>Engage brake on cart (while moving to OT or another area)</b>           | T15SN did not apply brake to two carts when moving them to their desired location prior to draping                                       | T15SN stated they felt rushed and wanted to complete the task in a timely manner                                                            |
| <b>Engage locking ring on instrument arm drape cap</b>                     | On two carts, T12SN left the red marks exposed on the drape cap after engaging the locking ring                                          | T12SN did not pay attention to the red marks                                                                                                |
| <b>Fit drape insert to drape cap</b>                                       | T4SN did not fit the drape cap insert on the purple arm                                                                                  | T4SN stated that they thought she had fitted the drape cap insert onto the drape cap                                                        |
|                                                                            | T5SN failed to establish connection between drape cap insert and drape cap. T5SN broke sterility when rearranging position of the insert | No root cause established as instance recognised after the event                                                                            |
| <b>Pull down cart drape to cover cart either from inside or using cuff</b> | T8CN did not completely pull down one side of the drape on the purple arm                                                                | T8CN stated that they were unaware of it and did not notice at any point during the session                                                 |
| <b>Locate cart drape elastic at top of cart column</b>                     | T6SN did not drape elasticated drape collar correctly                                                                                    | T6SN stated that it is hard to position the elasticated collar at the top of the column                                                     |
|                                                                            | T1SN left a small gap between the arm and cart drape, exposing the casework below the drape                                              | T1SN was observed to be carefully checking around the interface between the top of the cart column and the cart drape elastic for some time |
|                                                                            | T11SN – Elastic was not positioned under the metal ring on the cart halo on the visualisation arm                                        | The camera light cord interfered with the positioning of the elastic                                                                        |
|                                                                            | T16SN did not place elastic collar fully under the groove for every BSU                                                                  | The metal ring on the cart does not fully retain the elastic                                                                                |
| <b>Port training endoscope</b>                                             | T14AS used very small circles of the arm to get the virtual pivot point                                                                  | T14AS could not recall exactly how it was mentioned in training regarding the arc/circles                                                   |
| <b>Activate cart brake for cart positioning</b>                            | T1S tried to port train a number of times until they realised the BSU was not braked                                                     | T1S pushed the brake button but not long enough and did not look at the HUD for confirmation                                                |
|                                                                            | T4AS trapped the video feed cable under braked skirt                                                                                     | T4AS was unaware that the cable was caught                                                                                                  |
| <b>Set and check relative cart position</b>                                | T6S had difficulty moving instruments in desired direction because the BSU was orientated in the wrong direction                         | T6S thought that the directional arrow light was not very clearly visible                                                                   |

## Revised Versius Usability Study – Supplementary Materials

23 January 2020

| Task                                                                                                          | Description                                                                                                                                                 | Root Cause                                                                                                                                               |
|---------------------------------------------------------------------------------------------------------------|-------------------------------------------------------------------------------------------------------------------------------------------------------------|----------------------------------------------------------------------------------------------------------------------------------------------------------|
| <b>Attach new instrument (either during first port-training or in instrument change or instrument adjust)</b> | T6S did not properly attach the instrument to the purple arm                                                                                                | When the instrument was attached to the arm, T6S thought that it was correctly attached                                                                  |
|                                                                                                               | T9AS failed to clip instrument fully down on one side                                                                                                       | T9AS found the clips too small to hold                                                                                                                   |
|                                                                                                               | T2AS attached a fenestrated grasper to the purple arm with the arm unlocked at the bedside                                                                  | T2AS was aware that the arms were unlocked when attaching the instruments. T2AS stated they were distracted and knew that the arms should be locked      |
| <b>Insert instrument into port</b>                                                                            | T9AS transitioned into unlocked mode, then inserted the instrument into the cavity, crossing through the field of endoscope vision but proceeding beyond it | T9AS missed part of the training, including practice on inserting instruments                                                                            |
| <b>Switch arm to port training mode by locating and pressing wrist button</b>                                 | T5AS left an arm in unlocked mode with an instrument attached inside the port                                                                               | T5AS knew not to leave an arm in unlocked mode with an instrument attached inside the patient. This was an unintentional error                           |
|                                                                                                               | T14AS left the needle holder resting at the tip of a port in unlocked mode                                                                                  | T14AS attention was diverted whilst resolving other issues                                                                                               |
| <b>Port train the virtual pivot point by moving the wrist in an arc back and forth</b>                        | T8AS held port whilst conducting port training on two attempts                                                                                              | T8AS mentioned too many steps and different actions to remember                                                                                          |
|                                                                                                               | T14S – port training failed first time as they held wrist and quickly let go                                                                                | T14S stated that they failed to remember what they practiced in training                                                                                 |
| <b>Advance instrument into cavity using arm so that instrument is visible to surgeon</b>                      | T13S advanced scissors into cavity and hit surgical mode with tip out of view                                                                               | T13S cited inexperience as the cause of the error                                                                                                        |
| <b>Set the screen height</b>                                                                                  | T2S did not adjust the height of the console screen                                                                                                         | T2S was focused on adjusting herself to the system and the use of the instruments                                                                        |
| <b>Assign endoscope angle</b>                                                                                 | T4S did not check or assign endoscope angle during console setup                                                                                            | T4S knew how to perform the task as they did check/assign endoscope angle during the procedure but failed to remember during console setup               |
|                                                                                                               | T9S did not change the endoscope angle setting in the HUD menu when the angle changed from the 30° down to 0°                                               | T9S attention was diverted as this task coincided with another                                                                                           |
| <b>Moves instrument to the operative field</b>                                                                | T6S tried to move the instrument on the blue arm but had limited range of motion on the arm                                                                 | T6S believed the team did not adequately anticipate the range of motion required for the port placement and stated there were problems with insufflation |
|                                                                                                               | T16S – sometimes the surgeon would move the instrument into vision, as opposed to moving the camera towards the instrument                                  | T16S stated that he knew at all times where the instruments were due to extensive experience                                                             |
| <b>Engage instrument</b>                                                                                      | T12S engaged several instruments while not under vision                                                                                                     | T12S stated he had trouble getting back to view and when he looked over at the visualisation arm, he noticed one of angles was very acute                |

## Revised Versius Usability Study – Supplementary Materials

23 January 2020

| Task                                                                  | Description                                                                                                                                             | Root Cause                                                                                            |
|-----------------------------------------------------------------------|---------------------------------------------------------------------------------------------------------------------------------------------------------|-------------------------------------------------------------------------------------------------------|
| <b>Actuate electrosurgery</b>                                         | T10S engages electrosurgery twice while trying to disengage the instrument                                                                              | T10S stated that he got confused and engaged the wrong button                                         |
|                                                                       | T11S unintentionally activated electrosurgery                                                                                                           | T11S thought that she was hitting the clutch button while trying to maneuver closer                   |
|                                                                       | T14S was using the cut mode on monopolar curved scissors and touched the tip of the instrument with the bipolar Maryland grasper                        | T14S may not have been aware that instrument tips were too close together                             |
| <b>Miscellaneous errors arising during general surgical procedure</b> | T4S used engaged instruments (holding tissue) when the HUD was not working                                                                              | T4S stated that if he had visualisation and the instruments were working, he would continue           |
|                                                                       | T4AS and T4SN allowed instruments to be left in the cavity when insufflation was unexpectedly lost                                                      | Insufflation was accidentally turned off by the research center staff                                 |
|                                                                       | T6S continued to work using engaged instruments when HUD icons disappeared from the screen                                                              | T6S felt that he still had control of the instruments and decided to continue working                 |
|                                                                       | T6AS aware of continuing surgery without HUD icons                                                                                                      | T6AS was happy to continue if the surgeon was happy                                                   |
|                                                                       | T7SN performed an instrument change in instrument adjust mode despite having no icons available                                                         | The system has two forms of feedback (visual and audio). The audio feedback was functional            |
|                                                                       | T1AS touched their back on the visualisation arm drape. User was not aware they did this                                                                | T1AS acknowledged that space is limited between units when changing instruments                       |
|                                                                       | Drape cap insert had come off when removing an instrument off the arm                                                                                   | T7AS did not realise that it was part of the arm, and therefore did not realise that it was unsterile |
| <b>Maintain sterility</b>                                             | T9AS touched a draped arm as the BSUs were being brought to the bedside                                                                                 | Caused by small room used compared to the size of the operating room T9AS would expect                |
|                                                                       | T9SN pressed against the patient's undraped, raised right knee in order to reach the cyan arm                                                           | Participant thought it was fine to do so as it was not a real procedure                               |
|                                                                       | T9SN switched positions from between the patient's legs (and touching patient's right foot with non-working hand) to working with arms in sterile field | The participant thought it was fine to do so as it was not a real procedure                           |
|                                                                       | T9SN made brief contact between the hanging, non-sterile portion of the draped cable and the sterile portion of the other draped camera                 | T9SN stated they did not notice this, and that if they had noticed, would have re-draped the camera   |
|                                                                       | T9SN reached down and briefly lifted the non-sterile, hanging portion of the draped camera cable                                                        | T9SN did not remember the occurrence, but acknowledged they should have re-gloved                     |
|                                                                       | T11S tried to go to system status but hand detect would not work as they were wearing gloves.                                                           | T11S confirmed that T11CN stated that they would scrub in but that this did not happen                |

## Revised Versius Usability Study – Supplementary Materials

23 January 2020

| Task                                                                                                                                 | Description                                                                                                                                 | Root Cause                                                                                                                                      |
|--------------------------------------------------------------------------------------------------------------------------------------|---------------------------------------------------------------------------------------------------------------------------------------------|-------------------------------------------------------------------------------------------------------------------------------------------------|
| <b>Surgeon clears instrument jaws of anatomy</b>                                                                                     | T13S did not release bowel from the grasper jaws after requesting an instrument change                                                      | T13S confirmed that it was a mistake not to open the grasper                                                                                    |
| <b>Surgeon request instrument change</b>                                                                                             | T9S gave a confusing instrument change request to the bedside team                                                                          | The moderator was briefed to ask the surgeon (at a point when he was grasping tissue) to request an instrument change in instrument adjust mode |
| <b>Use one hand to retract instrument by sliding along the virtual Z rail. Use other hand to hold the port</b>                       | T13AS removed the grasper on the blue arm the grasper was grasping the bowel tissue                                                         | T13AS stated they were agitated by the environment                                                                                              |
| <b>Slide new instrument along the virtual Z rail until it is in view of endoscope</b>                                                | T14AS was unable to slide needle holder along z-rail back into cavity                                                                       | Observer unable to determine why the user was unable to re-insert the instrument                                                                |
| <b>Press the wrist button to return arm from instrument change mode to surgical mode</b>                                             | T14AS did not complete this task (specific to instrument change, did demonstrate with endoscope)                                            | Suspected system error meant instrument was unable to return along z-rail                                                                       |
| <b>Surgeon straightens/closes instrument jaws using thumbstick</b>                                                                   | T13S straightened grasper but did not close instrument jaws                                                                                 | T13S stated he forgot due to inexperience                                                                                                       |
| <b>User moves to Instrument Adjust by pressing elbow button</b>                                                                      | T1AS entered unlocked mode intentionally with an instrument inside of the patient                                                           | T1AS acknowledged that a user should not have the instrument unlocked within the patient                                                        |
|                                                                                                                                      | T11SN entered unlocked mode intentionally with an instrument inside of the patient, tested the range of motion then withdrew the instrument | T11SN was responding to a direct request from the surgeon                                                                                       |
| <b>Use one hand to retract instrument by sliding back through port. Use other hand to hold the port (instrument adjust scenario)</b> | T2AS did not look at the auxiliary screen when retracting an instrument                                                                     | T2AS did not think vision was required as the instrument was not grasping tissue                                                                |
|                                                                                                                                      | T6AS hit tissue when removing instrument                                                                                                    | T6AS stated that losing insufflation caused them to hit the tissue                                                                              |
|                                                                                                                                      | T9AS withdrew Maryland grasper from the patient without releasing tissue                                                                    | T9AS missed part of the training, including practice on inserting/removing instruments                                                          |
| <b>Attach new instrument (in instrument adjust mode)</b>                                                                             | T1S did not fully attach instrument                                                                                                         | As a surgeon, T1S would not be doing this. Therefore, did not pay enough attention                                                              |

1

## Revised Versius Usability Study – Supplementary Materials

23 January 2020

| Task                                                                                    | Description                                                                                                                                                                     | Root Cause                                                                                                                                                   |
|-----------------------------------------------------------------------------------------|---------------------------------------------------------------------------------------------------------------------------------------------------------------------------------|--------------------------------------------------------------------------------------------------------------------------------------------------------------|
| <b>Apply brake to cart (remove all arms scenario)</b>                                   | T2SN, T4AS, T4CN, T4SN, T5SN and T14SN failed to brake BSU(s)                                                                                                                   | T2SN, T4AS, T4CN and T14SN inattention led to the incompleteness of this task<br>T4SN and T5SN stated that as SNs they would not normally complete this task |
| <b>Activate visualisation BSU brake (close with scope scenario)</b>                     | T4AS and T5CN failed to activate the BSU brake                                                                                                                                  | T4AS pressed the brake button but not for long enough<br>T5CN stated they were distracted by something else they deemed to be a higher priority              |
| <b>Withdraw instrument from patient under visualisation using alternative endoscope</b> | T2AS did not look at the auxiliary screen when manually retracting an instrument after alarm                                                                                    | T2AS used their clinical judgement and did not look at the screen because she knew the instrument was not grasping tissue                                    |
| <b>Place electrosurgical cables in tray for sterilisation</b>                           | T15 sent two sets of cables to the incorrect location                                                                                                                           | T15SN stated that the team felt rushed during the clean-up and nervous with observers watching                                                               |
| <b>Wipe instrument shaft, head and tip to remove excess soiling</b>                     | T7SN wiped the instrument shaft and tip but did not wipe the instrument head                                                                                                    | T7SN stated that this was normal practice and acceptable in her hospital                                                                                     |
| <b>User wipes surface of cart</b>                                                       | T10SN and T12SN did not apply cart brake and so the unexposed part of the cart was not cleaned<br>T16CN did not wipe the skirt of the cart                                      | T10SN and T12SN inattention resulted in not all of the cart being wiped<br>T16CN was aware that this needed to be done, but forgot                           |
| <b>Q: How long do you need to wipe the cables for</b>                                   | T6CN thought because the cables were not near the patient, disinfecting for 2 minutes not needed<br>T11CN did not answer the question but said it would be done by someone else | T6CN and T11CN stated that this would not normally be their job                                                                                              |
| <b>Switch off console power switch</b>                                                  | T12CN did not switch the console off before unplugging its power cable                                                                                                          | T12CN forgot the console was still on when unplugging the power cable                                                                                        |
| <b>Clean console power cable</b>                                                        | T12CN did not clean the power cable                                                                                                                                             | T12CN forgot to clean the cable                                                                                                                              |
| <b>User checks for clearance around arm before folding arm (sleep scenario)</b>         | T17S did not create adequate space around the arm prior to attempting to put it to sleep.                                                                                       | T17S stated that a lack of thought arising from the unfamiliarity with the task caused the problem                                                           |

BSU: Bedside unit.

Revised Versius Usability Study – Supplementary Materials

23 January 2020

1 **Supplemental Figure 1.** System Workflow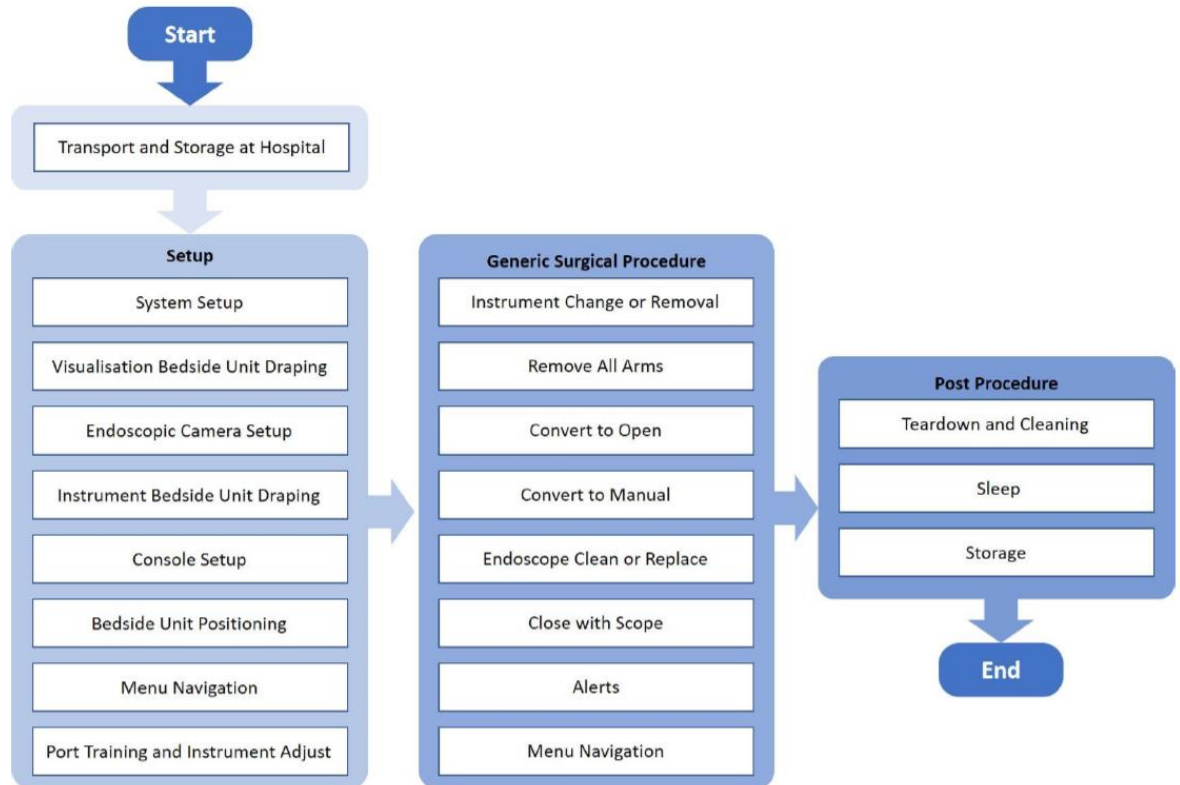

Supplement: bmjsit-2019-000028supp001.pdf [file bmjsit-2019-000028supp001.pdf]
